# Supplementary material for: The synthesis, characterisation and reactivity of 2-phosphanylethylcyclopentadienyl complexes of cobalt, rhodium and iridium
Source: Royal Society of Chemistry journal article supplement (doi:10.1039/b512054c), 2005-11-21
Supplement: b512054c.pdf [file b512054c.pdf]

## Supplementary Material

### Kinetic Data

**Table S1.** Observed pseudo first order rate constants ( $k_{\text{obs}}$ ) and calculated second order rate constants ( $k_1$ ) for oxidative addition of MeI to  $[\text{Rh}(\text{C}_5\text{H}_4(\text{CH}_2)_2\text{PET}_2)(\text{CO})]$  in  $\text{CH}_2\text{Cl}_2$ .

| $T / ^\circ\text{C}$ | $[\text{MeI}] / \text{mol dm}^{-3}$ | $10^3 k_{\text{obs}} / \text{s}^{-1}$ | $10^2 k_1 / \text{dm}^3 \text{mol}^{-1} \text{s}^{-1}$ |
|----------------------|-------------------------------------|---------------------------------------|--------------------------------------------------------|
| 11                   | 0.08                                | 2.62                                  | 3.28                                                   |
| 16                   | 0.08                                | 3.57                                  | 4.46                                                   |
| 16                   | 0.16                                | 7.79                                  | 4.87                                                   |
| 16                   | 0.24                                | 10.6                                  | 4.42                                                   |
| 16                   | 0.32                                | 15.3                                  | 4.78                                                   |
| 21                   | 0.08                                | 4.88                                  | 6.10                                                   |
| 25                   | 0.08                                | 6.24                                  | 7.80                                                   |
| 29                   | 0.08                                | 8.11                                  | 10.1                                                   |

**Table S2.** Observed pseudo first order rate constants ( $k_{\text{obs}}$ ) and calculated second order rate constants ( $k_1$ ) for oxidative addition of MeI to  $[\text{Rh}(\text{C}_5\text{Me}_4(\text{CH}_2)_2\text{PPh}_2)(\text{CO})]$  in  $\text{CH}_2\text{Cl}_2$ .

| $T / ^\circ\text{C}$ | $[\text{MeI}] / \text{mol dm}^{-3}$ | $10^2 k_{\text{obs}} / \text{s}^{-1}$ | $k_1 / \text{dm}^3 \text{mol}^{-1} \text{s}^{-1}$ |
|----------------------|-------------------------------------|---------------------------------------|---------------------------------------------------|
| 10                   | 0.08                                | 7.91                                  | 0.989                                             |
| 16                   | 0.08                                | 8.55                                  | 1.07                                              |
| 21                   | 0.08                                | 14.0                                  | 1.75                                              |
| 25                   | 0.08                                | 17.8                                  | 2.23                                              |
| 29                   | 0.08                                | 20.4                                  | 2.54                                              |

**Table S3.** Rate constants ( $k_2$ ) for methyl migration in complexes  $[\text{Rh}(\text{C}_5\text{R}_4(\text{CH}_2)_2\text{PR}'_2)(\text{CO})\text{Me}]^+\text{T}^-$  (measured in  $\text{CH}_2\text{Cl}_2$  containing  $2.0 \text{ mol dm}^{-3}$  MeI).

| T/°C | $10^3 k_2 / \text{s}^{-1}$ |                 |                 |
|------|----------------------------|-----------------|-----------------|
|      | R = H, R' = Et             | R = Me, R' = Ph | R = Me, R' = Et |
| 11   | 3.38                       | 3.75            | 1.34            |
| 16   | 6.25                       | 7.36            | 2.51            |
| 20   |                            | 11.0            | 4.11            |
| 21   | 9.87                       |                 |                 |
| 25   | 14.7                       | 17.5            | 6.76            |
| 29   |                            | 27.1            | 10.7            |
| 30   | 21.1                       |                 |                 |

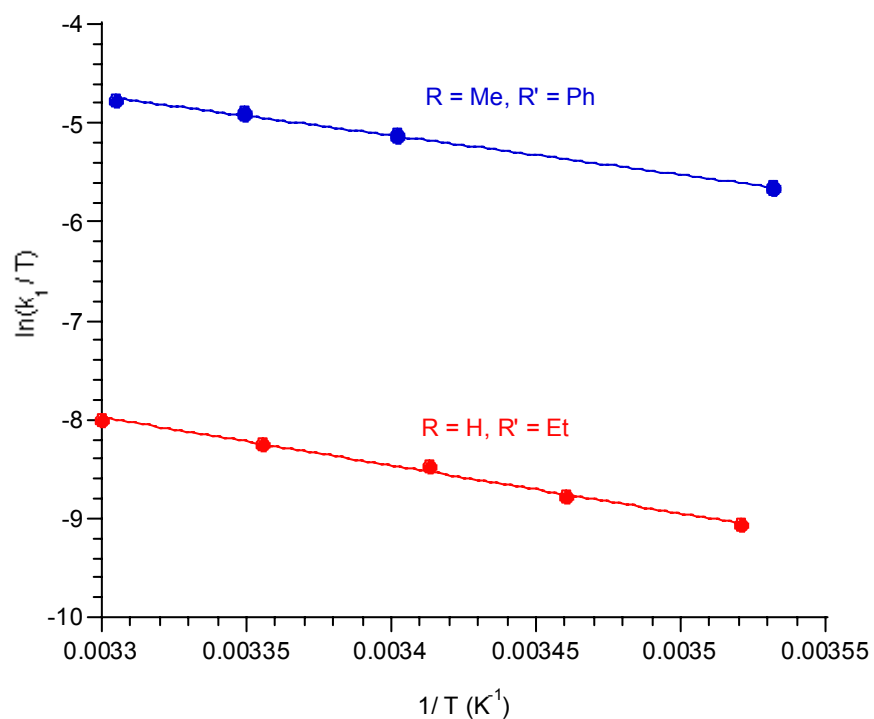

**Figure S1.** Eyring plots for oxidative addition of MeI to  $[\text{Rh}(\text{C}_5\text{R}_4(\text{CH}_2)_2\text{PR}'_2)(\text{CO})]$ .

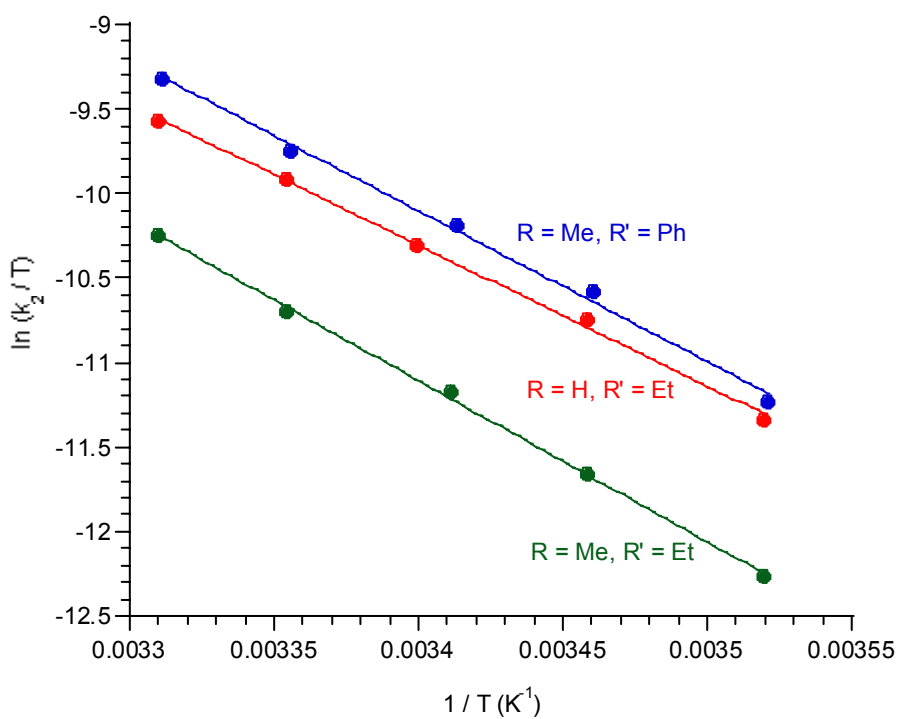

**Figure S2.** Eyring plots for methyl migration in  $[\text{Rh}(\text{C}_5\text{R}_4(\text{CH}_2)_2\text{PR}'_2)(\text{CO})\text{Me}]^+\text{T}^-$ .

## Crystal Structures

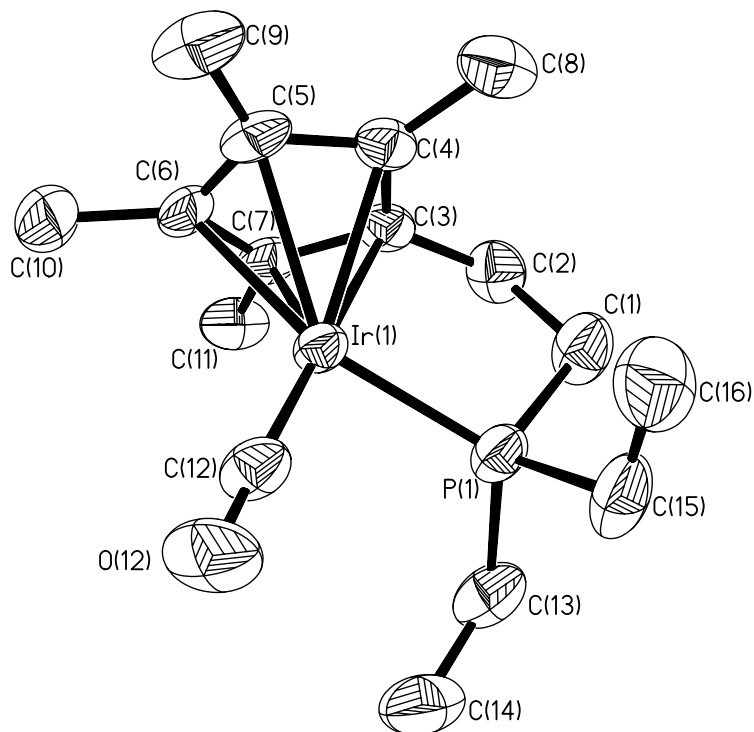

**Figure S3** Molecular structure and numbering scheme for [Ir(Cp'(CH<sub>2</sub>)<sub>2</sub>PEt<sub>2</sub>)CO]
